# Supplementary material for: Host Factors Modulating Ochratoxin A Biosynthesis during Fruit Colonization by Aspergillus carbonarius
Source: PubMed Central journal article supplement (PMC7823970; doi:10.3390/jof7010010), 2020-12-28
Supplement: jof-07-00010-s001.pdf [file jof-07-00010-s001.pdf]

## Supplementary material

**Table S1. Primer sequences used for qRT-PCR analysis**

| #  | Primer name | Sequence (5'-3')         | Description                                  |
|----|-------------|--------------------------|----------------------------------------------|
| 1  | Btub_carF   | GGACGAGATGGAGTTCCTGA     | <i>β-tubulin</i> control gene                |
| 2  | Btub_carR   | CCTCTTGCTCAAGGACCTCCT    |                                              |
| 3  | AcLaeA LI   | CACCTATAACAACCTCCGAACCAC | Velvet complex <i>laeA</i> gene              |
| 4  | AcLaeA LJ   | GGTTCGGCCAACCGACGACGCTG  |                                              |
| 5  | AcGox f2    | TCGAACACTCTGGCATTGGA     | Glucose oxidase ( <i>gox</i> ) gene          |
| 6  | AcGox r2    | GTGGTTTGGTCCTGCAGGTT     |                                              |
| 7  | PKS_carF    | GGGATCGTACGATCTGGTGAT    | OTA cluster polyketide synthase              |
| 8  | PKS_carR    | GGGAACACATGAGGTCAGGCT    |                                              |
| 9  | NRPS_carF   | CGGTAGAAAGACTGCAGTCCAT   | OTA cluster non-ribosomal peptide synthetase |
| 10 | NRPS_carR   | CGTCGGAATCCATTGCGCTGA    |                                              |
| 11 | bZip_carF   | CTCGACGGTTCGAGCCTTCT     | OTA cluster bZip transcription factor        |
| 12 | bZip_carR   | GCATTGCTCTAGCTGCTCGA     |                                              |
| 13 | P450_carF   | CCATCGTCTCCAGAGAATCAGT   | OTA cluster cytochrome P450 monooxygenase    |
| 14 | P450_carR2  | GGTCTCGTCGTGATGAATCAAG   |                                              |
| 15 | HAL_carF    | GCCAGTAGAGGGACAGCCAT     | OTA cluster halogenase                       |
| 16 | HAL_carR    | GCTGGAGGTGGTGGTTGAGA     |                                              |
| 17 | AcCreA f1   | CCCTCAGGTGCCGAAAGTC      | Carbon catabolite repressor <i>creA</i> gene |
| 18 | AcCreA r1   | CGAAGTCACCGAGGAAAACC     |                                              |

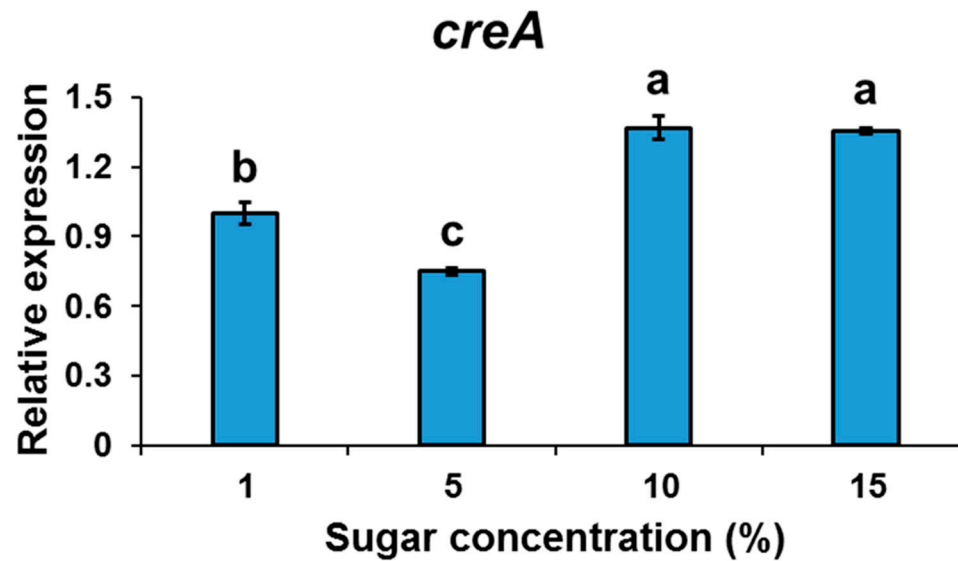

**Figure S1. Effect of sugar concentrations and pH changes on the relative expression *creA* gene.** Solid SGM media was supplemented with different sugar concentrations (glucose/fructose at a ratio of 2.33). The media was inoculated with 100  $\mu$ l of a  $10^6$  spores/ml *A. carbonarius* suspension and the relative expression of *creA* was compared at different conditions. RNA was extracted from mycelia at day 6 post-inoculation. Relative expression was normalized using  $\beta$ -tubulin as an internal control. The gene expression under sugar concentration of 1% was normalized as 1.0. Error bars represent standard error of three independent biological replicates. Different letters above the columns indicate statistically significant differences at  $p < 0.05$ , as determined using the Tukey's honest significant difference test.

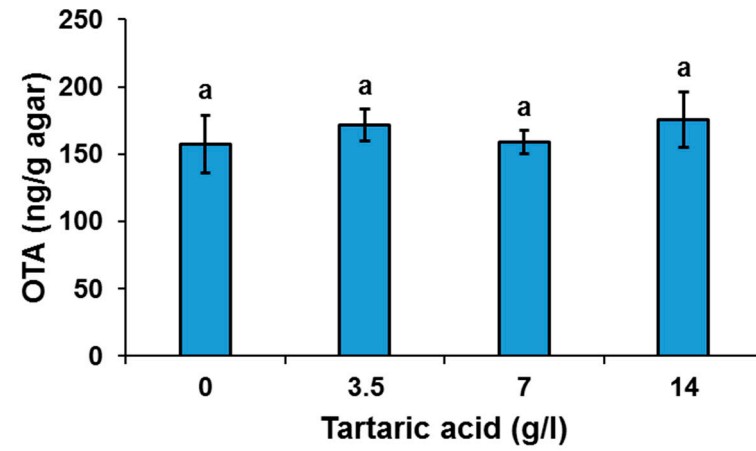

(a)

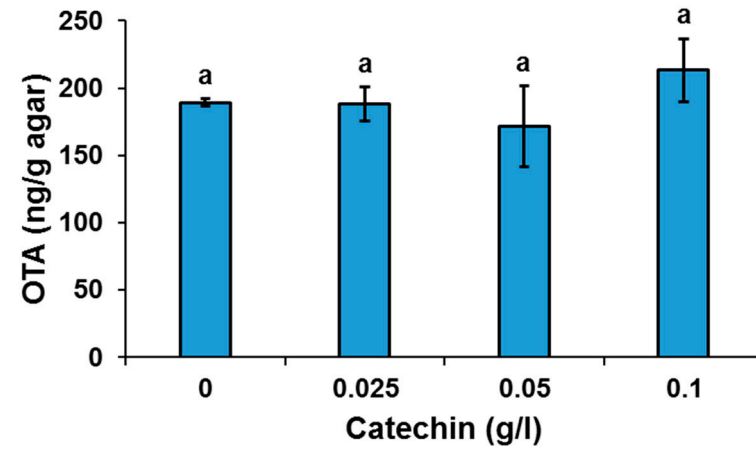

(b)

**Figure S2. Effect of tartaric acid and catechin on OTA accumulation *in vitro*.** Solid SGM media was amended with various concentrations of tartaric acid and catechin. Then, the media was inoculated with 100  $\mu$ l of a  $10^6$  spore/ml suspension of *A. carbonarius*, and OTA accumulation was evaluated at day 6 post-inoculation under different concentrations of tartaric acid (a) and catechin (b). Error bars represent standard error of three independent biological replicates. The letters above the columns indicate no statistical difference, as determined using the Tukey's honest significant difference test.
